# Supplementary material for: GalNAc-Lipid nanoparticles enable non-LDLR dependent hepatic delivery of a CRISPR base editing therapy
Source: PubMed Central journal article supplement (PMC10185539; doi:10.1038/s41467-023-37465-1), 2023-05-15
Supplement: 41467_2023_37465_MOESM1_ESM.pdf [file 41467_2023_37465_MOESM1_ESM.pdf]

## Supplemental Information

### Standard LNPs and GalNAc-LNPs

**Table S1:** LNP characterization and dosing data for Figures 1, 2, S1, S3, and S4, which were dosed into mice via retro-orbital injection at 10 mL/kg.

| LNP | Mouse Targets <sup>a</sup> | GalNAc-Lipid <sup>b</sup> |       |                         | Average LNP size (nm) | PDI   | RNA entrapment (%) | Dose (mg/kg)   | Figure     |
|-----|----------------------------|---------------------------|-------|-------------------------|-----------------------|-------|--------------------|----------------|------------|
|     |                            | Compound ID               | mol % | Method of incorporation |                       |       |                    |                |            |
| 1   | <i>Angptl3</i>             | GL6                       | 0.05  | c                       | 98.61                 | 0.013 | 94.91              | 0.1            | 1d         |
| 2   | <i>Angptl3</i>             | GL3                       | 0.05  | c                       | 100.4                 | 0.023 | 94.27              | 0.1            | 1d         |
| 3   | <i>Pcsk9</i>               | GL6                       | 0.5   | d                       | 79.3                  | 0.072 | 94.7               | 0.25           | 1e         |
| 4   | <i>Pcsk9</i>               | GL3                       | 0.5   | d                       | 74.1                  | 0.036 | 96                 | 0.25           | 1e         |
| 5   | <i>Angptl3</i>             | GL5                       | 0.05  | c                       | 100.6                 | 0.029 | 92.48              | 0.3            | 1f, S1(a)  |
| 6   | <i>Angptl3</i>             | GL6                       | 0.05  | c                       | 100.4                 | 0.034 | 93.59              | 0.3            | 1f, 1g, S1 |
| 7   | <i>Angptl3</i>             | GL7                       | 0.05  | c                       | 98.78                 | 0.032 | 92.86              | 0.3            | 1g, S1(b)  |
| 8   | <i>Angptl3</i>             | GL9                       | 0.05  | c                       | 100.9                 | 0.002 | 92.65              | 0.3            | 1g, S1(b)  |
| 9   | <i>Angptl3</i>             | GL6                       | 0     | N/A                     | 106.6                 | 0.01  | 94.85              | 0.1            | 2b         |
| 10  | <i>Angptl3</i>             | GL6                       | 0.01  | c                       | 98.35                 | 0.016 | 95.01              | 0.1            | 2b         |
| 11  | <i>Angptl3</i>             | GL6                       | 0.05  | c                       | 98.61                 | 0.013 | 94.91              | 0.1            | 2b         |
| 12  | <i>Angptl3</i>             | GL6                       | 0.25  | c                       | 95.98                 | 0.010 | 95.84              | 0.1            | 2b         |
| 13  | <i>Angptl3</i>             | GL6                       | 0.5   | c                       | 89.63                 | 0.025 | 96.15              | 0.1            | 2b         |
| 14  | <i>Angptl3</i>             | GL6                       | 1     | c                       | 98.35                 | 0.016 | 95.01              | 0.1            | 2b         |
| 15  | <i>Angptl3</i>             | GL6                       | 0     | N/A                     | 68.09                 | 0.002 | 98.66              | 0.25           | 2c, S4(a)  |
| 16  | <i>Angptl3</i>             | GL6                       | 0.05  | c                       | 66.73                 | 0.018 | 98.36              | 0.25           | 2c, S4(a)  |
| 17  | <i>Angptl3</i>             | GL6                       | 0.05  | c                       | 77.24                 | 0.028 | 99.2               | 0.1, 0.25, 0.5 | 2d, S4(b)  |
| 18  | <i>Angptl3</i>             | GL6                       | 0.05  | d                       | 120.6                 | 0.013 | 94.91              | 0.1            | S3         |
| 19  | <i>Angptl3</i>             | GL6                       | 0.05  | c                       | 98.61                 | 0.011 | 94.27              | 0.1            | S3         |

<sup>a</sup> The mouse *Angptl3* and *Pcsk9* gRNAs used in these studies were selected from Chadwick *et al.* WO2021178725.

<sup>b</sup> The GalNAc-Lipids GL3 and GL6 were synthesized and characterized as described in Rajeev *et al.* WO2021178725.

<sup>c</sup> GalNAc-Lipid is premixed with other LNP excipients prior to in-line mixing with RNA to form the GalNAc-LNPs as described in Rajeev *et al.* WO2021178725.

<sup>d</sup> GalNAc-Lipid was post-inserted into the LNP to obtain the desired GalNAc-LNP as described in Rajeev *et al.*, WO2021178725.

N/A: not applicable

Table S2: LNPs characterization and dosing data for generating the data shown in Figs. 3 and 4.

| LNP | NHP Target <sup>a</sup> | mol % GalNAc-Lipid GL6 <sup>b</sup> | Average LNP size (nm) | PDI   | RNA entrapment (%) | Dose (mg/kg) | Figure        |
|-----|-------------------------|-------------------------------------|-----------------------|-------|--------------------|--------------|---------------|
| 1   | <i>ANGPTL3</i>          | 0                                   | 74.97                 | 0.057 | 92.6               | 2            | 3e, 3f        |
| 2   | <i>ANGPTL3</i>          | 0                                   | 72.73                 | 0.032 | 94.3               | 2            | 3h, 4         |
| 3   | <i>ANGPTL3</i>          | 0.05                                | 72.93                 | 0.083 | 93.6               | 2            | 3e, 3f        |
| 4   | <i>ANGPTL3</i>          | 0.05                                | 71.97                 | 0.042 | 93.3               | 2            | 3e, 3g, 3h, 4 |

<sup>a</sup> The NHP *ANGPTL3* gRNA used in these studies was selected from Chadwick *et al.* WO2021178725.

<sup>b</sup> GalNAc-Lipid is premixed with other LNP excipients prior to in-line mixing with RNA to form the desired GalNAc-LNPs as described in Rajeev *et al.*, WO2021178725.

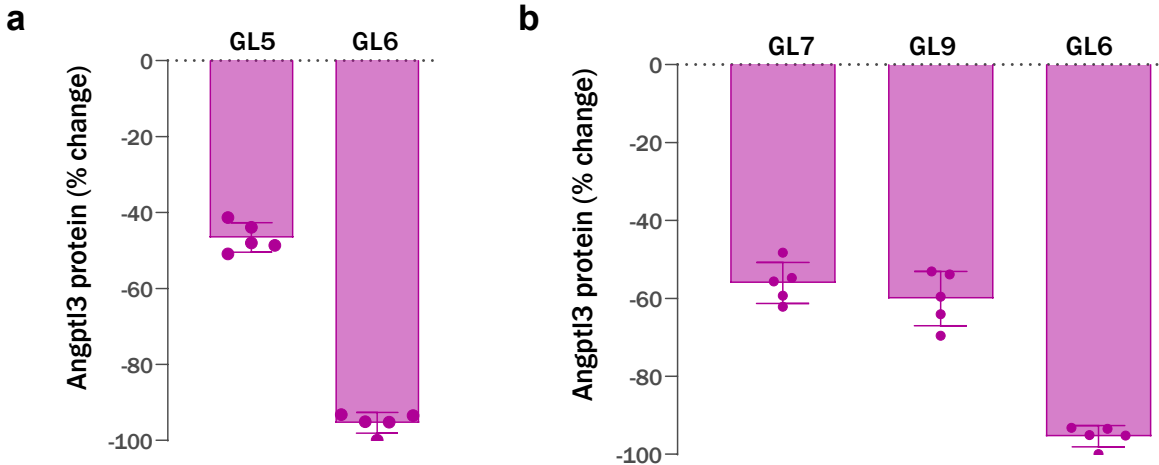

Figure S1: Structure-based evaluation of trivalent GalNAc-ligands with different spacers and anchors in *Ldlr*<sup>-/-</sup> mice at a dose of 0.3 mg/kg, as seen in Fig. 1. (a) GalNAc-LNPs formulated with the longer PEG spacer of GL6 (Table S1, entry 6) achieved a greater reduction in Angptl3 protein than the GalNAc-LNPs with the shorter PEG spacer of GL5 (Table S1 entry 5). (b) Modulation of the lipid tail hydrophobicity in GL7 and GL9 (Table S1, entries 7 and 8) was unable to improve the Angptl3 protein reduction of GalNAc-LNPs in *Ldlr*<sup>-/-</sup> mice compared to GL6 (Table S1, entry 6). Data are presented as mean values +/- standard deviation. Source data are provided as a Source Data file. (N = 5)

a)

Flowthrough

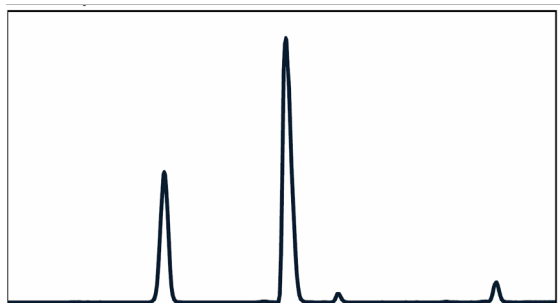

LNPs without GalNAc-Lipid do not bind to lectin affinity column

b)

Elution

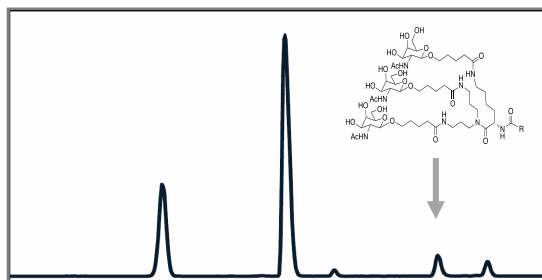

LNPs with GalNAc-Lipid GL6 bind and elute from the lectin affinity column

Figure S2: Confirmation of GalNAc-Lipid incorporation into the lipid nanoparticle (LNP). We generated GalNAc-LNPs with 0.5 mol % GL6 via a post-addition method of GalNAc-Lipid incorporation. These LNPs were then passed through a lectin affinity column, with PBS flowed into the column afterwards. LNPs containing GalNAc-Lipid would be expected to bind to the lectin column. Fractions of the flowthrough were then collected. If all LNPs contained GalNAc-Lipid, no LNPs would be expected in this flowthrough. The lectin column was then washed with PBS containing D-(+)-galactose and the column eluent was collected. Galactose is expected to displace GalNAc-LNPs from the column and now allow them to be eluted in the flowthrough. (a) Fractions collected from the flowthrough and rinse fractions in PBS when analyzed by IP-RPLC-HPLC-ELSD showed the presence of all 4 lipids in their expected molar composition. This indicates that a population of the post-addition manufactured LNPs do not actually contain GalNAc-Lipid at all, as they were unable to bind to the lectin column and were flushed out by the PBS. (b) Fractions collected from the elution with PBS containing D-(+)-Galactose showed GalNAc-Lipid in addition to the other four LNP excipients in the expected ratio. These data

indicate certain population, but not all, of the LNPs generated via the post-addition method contained GalNAc-Lipid, and so were displaced as expected by the galactose. The non-homogenous distribution of GalNAc-Lipid with post-addition incorporation motivated the development of in-lipid mixing formulations.

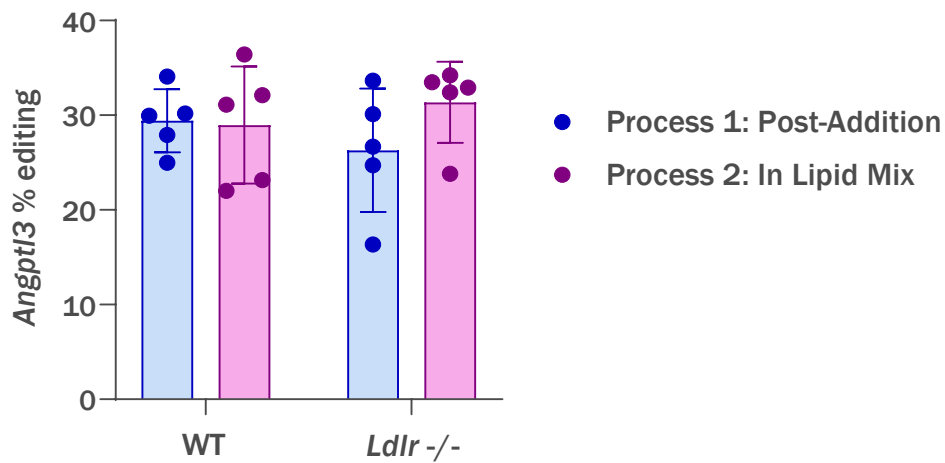

Figure S3: GalNAc-LNPs were formulated with 0.05 mol % GalNAc-Lipid GL6 added via post-addition or in-lipid mixing methods (Table S1, entries 18 and 19). GalNAc-LNPs prepared by both methods produced nearly identical editing in wild type (WT) and *Ldlr*  $-/-$  mice at a 0.1 mg/kg dose. Data are presented as mean values  $\pm$  standard deviation. Source data are provided as a Source Data file. (N = 5 biologically independent mice.)

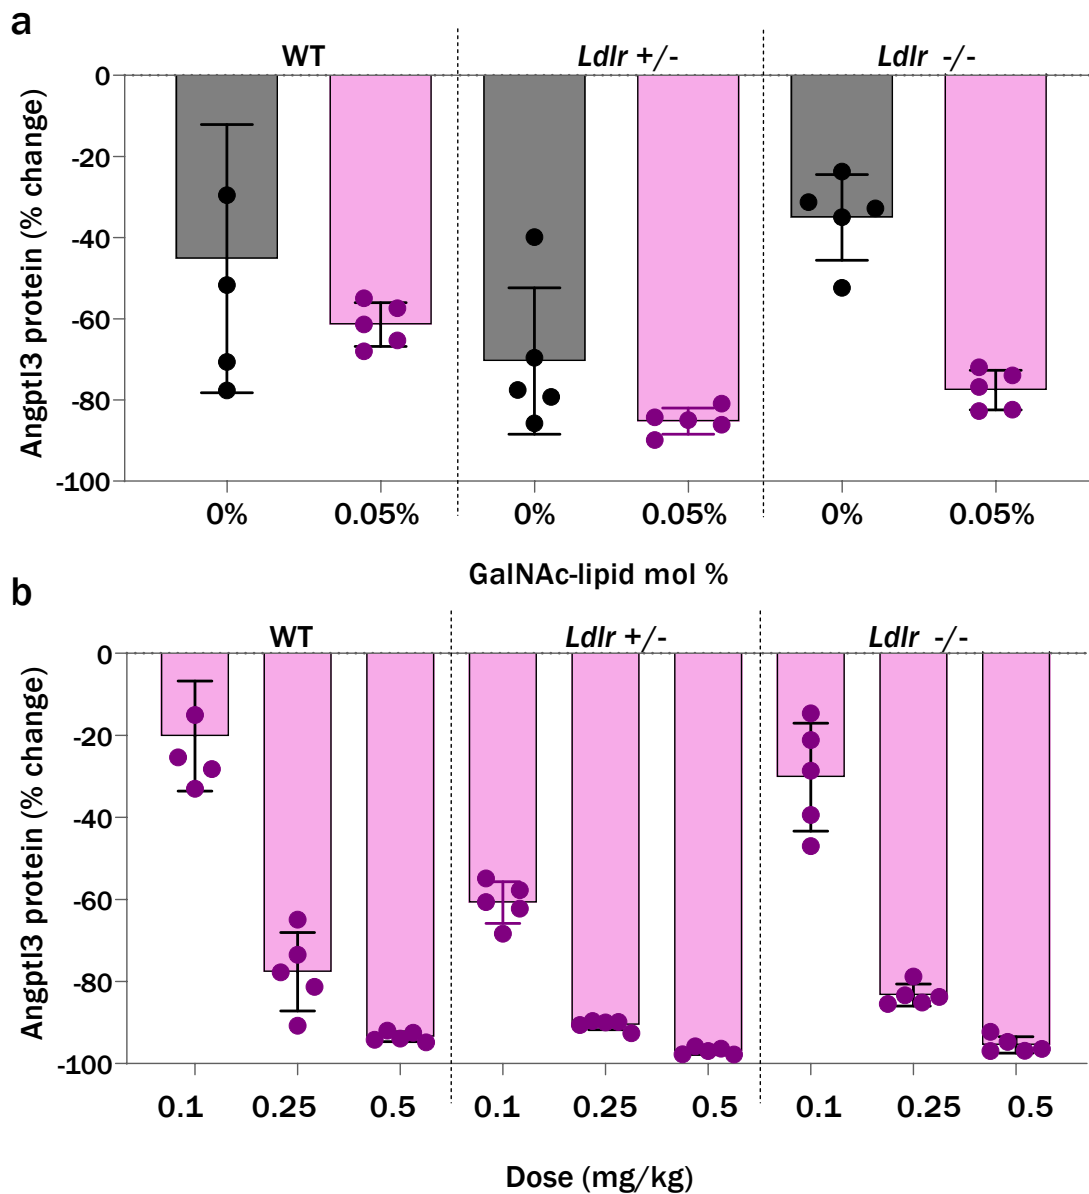

Figure S4: Angptl3 protein reductions corresponding to *Angptl3* editing findings in Figs. 2c and 2d. (a) LNPs formulated with and without 0.05 mol % GL6 were administered to WT, *Ldlr*<sup>+/-</sup>, and *Ldlr*<sup>-/-</sup> mice at 0.25 mg/kg. The inclusion of GalNAc-Lipid GL6 rescued activity in *Ldlr*<sup>-/-</sup> mice and maintained activity in WT and *Ldlr*<sup>+/-</sup> (Table S1, entries 15 and 16). (b) 0.05 mol % GL6 GalNAc-LNPs were administered at the stated doses to WT, *Ldlr*<sup>+/-</sup>, and *Ldlr*<sup>-/-</sup> mice. Dose-dependent Angptl3 protein reduction was achieved in all three animal models with the GalNAc-LNP evaluated (Table S1, entry 17). Data are presented as mean values +/- standard deviation.

Source data are provided as a Source Data file. (N = 5 biologically independent mice, except for 0% GalNAc-lipid in WT, which was N = 4 biologically independent mice.)

| Animal | Percentage of deletions of length 31-40 bp | Total percentage of insertions or deletions | Percentage of deletions of length 31-40 bp with respect to total indels |
|--------|--------------------------------------------|---------------------------------------------|-------------------------------------------------------------------------|
| 1      | 56.38                                      | 64.28                                       | 87.7                                                                    |
| 2      | 68.83                                      | 74.62                                       | 92.2                                                                    |
| 3      | 60.82                                      | 67.29                                       | 90.4                                                                    |
| 4      | 63.09                                      | 68.92                                       | 91.5                                                                    |
| 5      | 67.74                                      | 73.04                                       | 92.7                                                                    |
| 6      | 62.17                                      | 68.23                                       | 91.1                                                                    |
| 7      | 55.8                                       | 61.32                                       | 91.0                                                                    |
| 8      | 65.71                                      | 71.88                                       | 91.4                                                                    |
| 9      | 51.39                                      | 58.23                                       | 88.3                                                                    |
| 10     | 67.86                                      | 73                                          | 93.0                                                                    |

Table S3: Indel creation in LDLR deficient NHP model using dual Cas9 guide-loaded LNPs.

| Days Post Infusion | LDL-C Absolute values (mg/dL) |      |      |             |    |      |
|--------------------|-------------------------------|------|------|-------------|----|------|
|                    | Standard LNPs                 |      |      | GalNAc-LNPs |    |      |
| 0                  | 35.7                          | 39.3 | 69.3 | 38.7        | 59 | 76.7 |
| 7                  | 36                            | 31   | 50   | 28          | 53 | 61   |
| 14                 | 32                            | 35   | 53   | 23          | 52 | 64   |
| 21                 | 31                            | 45   | 62   | 33          | 60 | 73   |
| 28                 | 30                            | 37   | 51   | 29          | 58 | 71   |
| 42                 | 32                            | 42   | 64   | 41          | 67 | 82   |
| 56                 | 32                            | 38   | 57   | 38          | 59 | 75   |
| 70                 | 39                            | 41   | 64   | 42          | 66 | 85   |
| 84                 | 36                            | 43   | 55   | 30          | 57 | 68   |
| 90                 | 39                            | 40   | 57   | 30          | 51 | 78   |

Table S4: Absolute LDL-C values (mg/dL) for WT NHPs treated with standard and GalNAc-LNPs at a 2 mg/kg dose, as depicted in Figure 3.



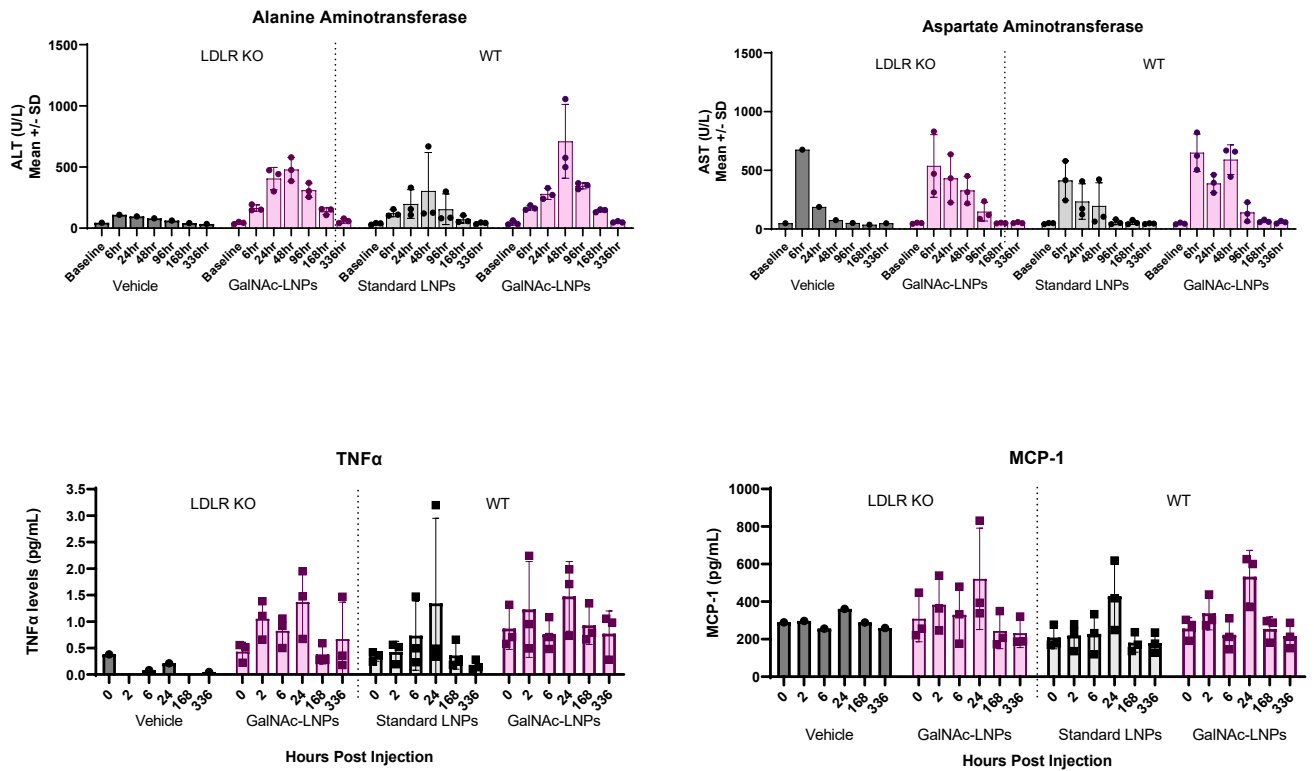

Figure S5: Liver toxicity and innate immune cytokine increases for low density lipoprotein receptor (*LDLR*) deficient and wild type (WT) NHPs treated with standard lipid nanoparticles (LNPs) and GalNac-LNPs are transient and return to baseline. (a) alanine aminotransferase (ALT), (b) aspartate aminotransferase (AST), (c) tumor necrosis factor  $\alpha$  (TNF $\alpha$ ), and (d) monocyte chemoattractant protein 1 (MCP-1) measured out to 14 days following 2 mg/kg doses of standard or GalNac-LNPs. Data are presented as mean values +/- standard deviation. Source data are provided as a Source Data file. (N = 3 biologically independent non-human primates.)
